# Supplementary material for: Identification and Association of Single Nucleotide Polymorphisms of the FTO Gene with Indicators of Overweight and Obesity in a Young Mexican Population
Source: MDPI journal article supplement (doi:10.3390/genes14010159), 2023-01-06
Supplement: s1 [file s1]

**Table S1.** Genetic variants analyzed. Genotypes, reference and alternative alleles show their respective frequencies. HWE p-values are also included.

| SNP         | Chromosome position | Reference/Alternative Alleles (Frequencies %) | Genotypes (Frequency %)                | HWE p-value |
|-------------|---------------------|-----------------------------------------------|----------------------------------------|-------------|
| rs1421091   | 53739773            | A/C<br>(0.504/0.496)                          | AA (25.71)<br>AC (49.37)<br>CC (24.92) | 0.753       |
| rs4389136   | 53747858            | A/G<br>(0.527/0.473)                          | AA (28.06)<br>AG (49.37)<br>GG (22.57) | 0.809       |
| rs140352368 | 53751902            | G/T<br>(0.997/0.003)                          | GG (99.37)<br>GT (0.62)<br>TT (0)      | 0.937       |
| rs7205986   | 53755146            | A/G<br>(0.799/0.201)                          | AA (65.04)<br>AG (29.62)<br>GG (5.33)  | 0.046       |
| rs1421084   | 53757740            | A/G<br>(0.969/0.031)                          | AA (94.36)<br>AG (5.02)<br>GG (0.63)   | 0.000       |
| rs57976072  | 53759099            | C/T<br>(0.995/0.005)                          | CC (99.06)<br>CT (0.94)<br>TT (0)      | 0.905       |
| rs4386132   | 53759123            | C/T<br>(0.972/0.028)                          | CC (94.36)<br>CT (5.64)<br>TT (0)      | 0.463       |
| rs7202836   | 53760532            | G/A<br>(0.991/0.009)                          | GG (98.43)<br>GA (1.41)                | 0.000       |

|            |          |                      |            |       |
|------------|----------|----------------------|------------|-------|
| rs9925311  | 53767648 | G/A<br>(0.976/0.024) | AA (0.16)  | 0.298 |
|            |          |                      | GG (95.30) |       |
|            |          |                      | GA (4.55)  |       |
| rs7203521  | 53769293 | G/A<br>(0.725/0.275) | AA (0.15)  | 0.732 |
|            |          |                      | GG (52.82) |       |
|            |          |                      | GA (39.34) |       |
| rs6499640  | 53769677 | G/A<br>(0.725/0.275) | AA (7.84)  | 0.732 |
|            |          |                      | GG (52.82) |       |
|            |          |                      | GA (39.34) |       |
| rs62048371 | 53770081 | A/G<br>(0.987/0.013) | AA (7.84)  | 0.004 |
|            |          |                      | AA (97.65) |       |
|            |          |                      | AG (2.19)  |       |
| rs74018195 | 53771105 | T/C<br>(0.991/0.009) | GG (0.15)  | 0.826 |
|            |          |                      | TT (98.28) |       |
|            |          |                      | TC (1.72)  |       |
| rs4396532  | 53773047 | G/A<br>(0.946/0.036) | CC (0)     | 0.846 |
|            |          |                      | GG (92.95) |       |
|            |          |                      | GA (6.90)  |       |
| rs79977114 | 53774354 | A/G<br>(0.989/0.011) | AA (0.15)  | 0.779 |
|            |          |                      | AA (97.81) |       |
|            |          |                      | AG (2.19)  |       |
| rs74449711 | 53784964 | T/G<br>(0.987/0.013) | GG (0)     | 0.004 |
|            |          |                      | TT (97.65) |       |
|            |          |                      | TG (2.19)  |       |
| rs1861868  | 53790402 | C/T<br>(0.693/0.307) | GG (0.15)  | 0.740 |
|            |          |                      | CC (48.28) |       |
|            |          |                      | CT (42.00) |       |
| rs1075440  | 53790906 | G/A                  | TT (9.72)  | 0.322 |
|            |          |                      | GG (36.05) |       |

|                   |          |                      |                                        |       |
|-------------------|----------|----------------------|----------------------------------------|-------|
|                   |          | (0.592/0.408)        | GA (46.40)<br>AA (17.55)               |       |
| <b>rs7191566</b>  | 53793204 | A/G<br>(0.816/0.184) | AA (65.99)<br>AG (31.19)<br>GG (2.82)  | 0.338 |
| <b>rs13334933</b> | 53795636 | A/G<br>(0.897/0.103) | AA (81.03)<br>AG (17.40)<br>GG (1.57)  | 0.159 |
| <b>rs6499642</b>  | 53797506 | C/T<br>(0.978/0.022) | CC (95.92)<br>CT (3.76)<br>TT (0.31)   | 0.002 |
| <b>rs8047395</b>  | 53798523 | G/A<br>(0.574/0.426) | GG (36.68)<br>GA (41.38)<br>AA (21.94) | 0.000 |
| <b>rs9939973</b>  | 53800568 | G/A<br>(0.731/0.269) | GG (54.08)<br>GA (38.08)<br>AA (7.84)  | 0.432 |
| <b>rs9940128</b>  | 53800754 | G/A<br>(0.731/0.269) | GG (54.08)<br>GA (38.09)<br>AA (7.83)  | 0.432 |
| <b>rs1421085</b>  | 53800954 | T/C<br>(0.787/0.213) | TT (64.26)<br>TC (28.84)<br>CC (6.89)  | 0.000 |
| <b>rs16952520</b> | 53803038 | A/G<br>(0.861/0.140) | AA (74.45)<br>AG (23.20)<br>GG (2.35)  | 0.394 |
| <b>rs1558902</b>  | 53803574 | T/A<br>(0.778/0.222) | TT (60.19)<br>TA (35.26)<br>AA (4.54)  | 0.585 |

---

|                   |          |                      |                                        |       |
|-------------------|----------|----------------------|----------------------------------------|-------|
| <b>rs55872725</b> | 53809123 | C/T<br>(0.793/0.207) | CC (63.32)<br>CT (31.97)<br>TT (4.70)  | 0.516 |
| <b>rs1121980</b>  | 53809247 | G/A<br>(0.723/0.277) | GG (52.98)<br>GA (38.71)<br>AA (8.30)  | 0.409 |
| <b>rs73612011</b> | 53809861 | A/G<br>(0.965/0.035) | AA (93.41)<br>AG (6.11)<br>GG (0.48)   | 0.010 |
| <b>rs72803680</b> | 53810635 | A/G<br>(0.882/0.118) | AA (78.36)<br>AG (19.74)<br>GG (1.88)  | 0.224 |
| <b>rs62033399</b> | 53810943 | C/T<br>(0.794/0.206) | CC (63.79)<br>CT (31.19)<br>TT (5.02)  | 0.236 |
| <b>rs16945088</b> | 53812524 | A/G<br>(0.886/0.114) | AA (81.19)<br>AG (14.89)<br>GG (3.91)  | 0.000 |
| <b>rs17817449</b> | 53813367 | T/G<br>(0.757/0.243) | TT (63.63)<br>TG (24.13)<br>GG (12.23) | 0.000 |
| <b>rs8043757</b>  | 53813450 | A/T<br>(0.751/0.249) | AA (63.32)<br>AT (23.51)<br>TT (13.17) | 0.000 |
| <b>rs11075987</b> | 53815161 | T/G<br>(0.571/0.429) | TT (33.86)<br>TG (46.55)<br>GG (19.59) | 0.210 |
| <b>rs8050136</b>  | 53816275 | C/A<br>(0.780/0.220) | CC (63.48)<br>CA (28.99)               | 0.000 |

---

|                   |          |                      |            |       |
|-------------------|----------|----------------------|------------|-------|
| <b>rs3751812</b>  | 53818460 | G/T<br>(0.811/0.189) | AA (7.52)  | 0.402 |
|                   |          |                      | GG (66.30) |       |
|                   |          |                      | GT (29.62) |       |
|                   |          |                      | TT (4.08)  |       |
| <b>rs3751813</b>  | 53818708 | G/T<br>(0.641/0.359) | GG (44.04) | 0.001 |
|                   |          |                      | GT (40.13) |       |
|                   |          |                      | TT (15.83) |       |
| <b>rs9936385</b>  | 53819169 | T/C<br>(0.794/0.206) | TT (63.32) | 0.646 |
|                   |          |                      | TC (32.13) |       |
|                   |          |                      | CC (4.55)  |       |
| <b>rs11075990</b> | 53819893 | A/G<br>(0.794/0.206) | AA (63.32) | 0.646 |
|                   |          |                      | AG (32.13) |       |
|                   |          |                      | GG (4.55)  |       |
| <b>rs9939609</b>  | 53820527 | T/A<br>(0.794/0.206) | TT (63.32) | 0.646 |
|                   |          |                      | TA (32.13) |       |
|                   |          |                      | AA (4.55)  |       |
| <b>rs7206629</b>  | 53821413 | T/C<br>(0.742/0.258) | TT (56.27) | 0.117 |
|                   |          |                      | TC (35.89) |       |
|                   |          |                      | CC (7.83)  |       |
| <b>rs7202116</b>  | 53821615 | A/G<br>(0.794/0.206) | AA (63.32) | 0.646 |
|                   |          |                      | AG (32.13) |       |
|                   |          |                      | GG (4.55)  |       |
| <b>rs7185735</b>  | 53822651 | A/G<br>(0.794/0.206) | AA (63.32) | 0.646 |
|                   |          |                      | AG (32.13) |       |
|                   |          |                      | GG (4.55)  |       |
| <b>rs9941349</b>  | 53825488 | C/T<br>(0.778/0.222) | CC (62.54) | 0.004 |
|                   |          |                      | CT (30.56) |       |
|                   |          |                      | TT (6.89)  |       |
| <b>rs17817964</b> | 53828066 | C/T                  | CC (65.99) | 0.597 |

|                    |          |                      |                                        |       |
|--------------------|----------|----------------------|----------------------------------------|-------|
|                    |          | (0.810/0.190)        | CT (30.09)<br>TT (3.91)                |       |
| <b>rs9930506</b>   | 53830465 | A/G<br>(0.640/0.361) | AA (61.76)<br>AG (4.39)<br>GG (33.86)  | 0.000 |
| <b>rs9922619</b>   | 53831771 | G/T<br>(0.774/0.226) | GG (61.91)<br>GT (30.88)<br>TT (7.21)  | 0.003 |
| <b>rs2111650</b>   | 53832816 | T/C<br>(0.867/0.133) | TT (75.86)<br>TC (21.63)<br>CC (2.51)  | 0.109 |
| <b>rs8044769</b>   | 53839135 | T/C<br>(0.495/0.505) | TT (33.07)<br>TC (32.91)<br>CC (34.01) | 0.000 |
| <b>rs111357538</b> | 53842712 | G/A<br>(0.985/0.015) | GG (97.02)<br>GA (2.97)<br>AA (0)      | 0.703 |
| <b>rs12149832</b>  | 53842908 | G/A<br>(0.803/0.197) | GG (64.89)<br>GA (30.72)<br>AA (4.39)  | 0.436 |
| <b>rs201041270</b> | 53844134 | G/A<br>(100/0)       | GG (100)<br>GA (0)<br>AA (0)           | -     |
| <b>rs75547181</b>  | 53845040 | A/G<br>(0.939/0.061) | AA (88.08)<br>AG (11.59)<br>GG (0.31)  | 0.791 |
| <b>rs11642841</b>  | 53845487 | C/A<br>(0.817/0.183) | CC (66.77)<br>CA (29.93)<br>AA (3.29)  | 0.942 |

---

|                    |          |                      |                                        |       |
|--------------------|----------|----------------------|----------------------------------------|-------|
| <b>rs146563001</b> | 53845575 | G/A<br>(0.999/0.001) | GG (99.84)<br>GA (0.16)<br>AA (0)      | 0.984 |
| <b>rs9972717</b>   | 53851304 | G/A<br>(0.876/0.124) | GG (76.49)<br>GA (22.26)<br>AA (1.25)  | 0.515 |
| <b>rs9925952</b>   | 53853898 | A/G<br>(0.392/0.608) | AA (15.51)<br>AG (47.33)<br>GG (37.14) | 0.863 |
| <b>rs11075995</b>  | 53855291 | A/T<br>(0.468/0.532) | AA (16.77)<br>AT (60.03)<br>TT (23.20) | 0.000 |
| <b>rs75929173</b>  | 53856104 | C/T<br>(0.995/0.005) | CC (99.06)<br>CT (0.04)<br>TT (0)      | 0.905 |
| <b>rs74018601</b>  | 53857113 | C/T<br>(0.969/0.031) | CC (94.04)<br>CT (5.79)<br>TT (0.15)   | 0.589 |
| <b>rs10852523</b>  | 53858954 | T/C<br>(0.632/0.368) | TT (40.13)<br>TC (46.23)<br>CC (13.64) | 0.890 |
| <b>rs61743972</b>  | 53860197 | G/C<br>(0.411/0.589) | GG (28.68)<br>GC (24.92)<br>CC (46.39) | 0.000 |
| <b>rs3826169</b>   | 53860481 | G/A<br>(0.269/0.731) | GG (15.83)<br>GA (22.10)<br>AA (62.07) | 0.000 |
| <b>rs10521308</b>  | 53865126 | G/A<br>(0.969/0.031) | GG (94.04)<br>GA (5.80)                | 0.589 |

---

|             |          |                      |            |       |
|-------------|----------|----------------------|------------|-------|
| rs10521307  | 53865701 | A/G<br>(0.813/0.187) | AA (0.16)  | 0.048 |
|             |          |                      | AA (67.24) |       |
|             |          |                      | AG (28.06) |       |
|             |          |                      | GG (4.70)  |       |
| rs7203572   | 53869366 | A/C<br>(0.710/0.290) | AA (61.44) | 0.000 |
|             |          |                      | AC (19.12) |       |
|             |          |                      | CC (19.44) |       |
| rs112728008 | 53871621 | A/G<br>(0.982/0.018) | AA (96.55) | 0.076 |
|             |          |                      | AG (3.29)  |       |
|             |          |                      | GG (0.15)  |       |
| rs17819033  | 53873103 | G/T<br>(0.879/0.121) | GG (77.11) | 0.878 |
|             |          |                      | GT (21.47) |       |
|             |          |                      | TT (1.41)  |       |
| rs8043785   | 53873666 | A/G<br>(0.722/0.278) | AA (53.91) | 0.022 |
|             |          |                      | AG (36.52) |       |
|             |          |                      | GG (9.56)  |       |
| rs17219983  | 53874918 | C/T<br>(0.717/0.283) | CC (51.25) | 0.835 |
|             |          |                      | CT (40.91) |       |
|             |          |                      | TT (7.84)  |       |
| rs12595985  | 53876751 | C/A<br>(0.916/0.084) | CC (84.17) | 0.435 |
|             |          |                      | CA (14.89) |       |
|             |          |                      | AA (0.94)  |       |
| rs2160481   | 53884113 | A/G<br>(0.668/0.332) | AA (43.88) | 0.428 |
|             |          |                      | AG (45.76) |       |
|             |          |                      | GG (10.34) |       |
| rs12448205  | 53885683 | A/G<br>(0.643/0.357) | AA (40.91) | 0.669 |
|             |          |                      | AG (46.71) |       |
|             |          |                      | GG (12.38) |       |
| rs9934979   | 53886587 | C/T                  | CC (13.63) | 0.000 |



|                    |          |                      |                                       |       |
|--------------------|----------|----------------------|---------------------------------------|-------|
|                    |          | (0.310/0.690)        | CT (34.79)<br>TT (51.56)              |       |
| <b>rs17820328</b>  | 53895804 | A/G<br>(0.975/0.025) | AA (95.14)<br>AG (4.70)<br>GG (0.16)  | 0.332 |
| <b>rs16952608</b>  | 53897352 | T/C<br>(0.962/0.038) | TT (92.47)<br>TC (7.37)<br>CC (0.16)  | 0.949 |
| <b>rs28551130</b>  | 53897914 | T/C<br>(0.973/0.027) | TT (94.67)<br>TC (5.32)<br>CC (0)     | 0.489 |
| <b>rs139397692</b> | 53902297 | G/A<br>(0.003/0.007) | GG (98.59)<br>GA (1.41)<br>AA (0)     | 0.858 |
| <b>rs4784329</b>   | 53910261 | A/C<br>(0.312/0.688) | AA (9.87)<br>AC (42.63)<br>CC (47.49) | 0.864 |
| <b>rs9934504</b>   | 53916879 | G/A<br>(0.910/0.090) | GG (83.07)<br>GA (15.83)<br>AA (1.10) | 0.380 |
| <b>rs56335873</b>  | 53920788 | T/A<br>(0.910/0.090) | TT (83.07)<br>TA (15.83)<br>AA (1.10) | 0.380 |
| <b>rs533143696</b> | 53929369 | C/T<br>(100/0)       | CC (100)<br>CT (0)<br>TT (0)          | -     |
| <b>rs2111112</b>   | 53937632 | T/C<br>(0.182/0.818) | TT (4.23)<br>TC (27.90)<br>CC (67.87) | 0.116 |

---

|                   |          |                      |                                        |       |
|-------------------|----------|----------------------|----------------------------------------|-------|
| <b>rs9929152</b>  | 53939403 | G/A<br>(0.231/0.769) | GG (11.91)<br>GA (22.41)<br>AA (65.67) | 0.000 |
| <b>rs79970796</b> | 53939594 | G/A<br>(0.996/0.004) | GG (99.21)<br>GA (0.78)<br>AA (0)      | 0.921 |
| <b>rs17821532</b> | 53946698 | G/A<br>(0.985/0.015) | GG (97.02)<br>GA (2.98)<br>AA (0)      | 0.703 |
| <b>rs76299885</b> | 53950231 | G/A<br>(0.988/0.012) | GG (97.65)<br>GA (2.35)<br>AA (0)      | 0.764 |
| <b>rs12232391</b> | 53953119 | T/G<br>(0.472/0.528) | TT (22.88)<br>TG (48.59)<br>GG (28.53) | 0.526 |
| <b>rs16952647</b> | 53954707 | G/A<br>(0.981/0.019) | GG (96.39)<br>GA (3.44)<br>AA (0.16)   | 0.097 |
| <b>rs16952657</b> | 53956934 | C/T<br>(0.933/0.067) | CC (87.46)<br>CT (11.76)<br>TT (0.78)  | 0.167 |
| <b>rs77673765</b> | 53965090 | G/A<br>(0.992/0.008) | GG (98.43)<br>GA (1.56)<br>AA (0)      | 0.842 |
| <b>rs9924072</b>  | 53966063 | A/G<br>(0.658/0.342) | AA (44.51)<br>AG (42.48)<br>GG (13.01) | 0.151 |
| <b>rs4784333</b>  | 53969088 | C/G<br>(0.323/0.677) | CC (9.09)<br>CG (46.39)                | 0.123 |

---

|                    |          |                      |            |       |
|--------------------|----------|----------------------|------------|-------|
| <b>rs78496669</b>  | 53975013 | C/T<br>(0.989/0.011) | GG (44.52) | 0.779 |
|                    |          |                      | CC (97.81) |       |
|                    |          |                      | CT (2.19)  |       |
|                    |          |                      | TT (0)     |       |
| <b>rs12933996</b>  | 53976662 | G/A<br>(0.513/0.487) | GG (26.33) | 0.986 |
|                    |          |                      | GA (50)    |       |
|                    |          |                      | AA (23.67) |       |
| <b>rs72807798</b>  | 53978631 | C/T<br>(0.992/0.008) | CC (98.59) | 0.000 |
|                    |          |                      | CT (1.25)  |       |
|                    |          |                      | TT (0.17)  |       |
| <b>rs16952662</b>  | 53978846 | G/A<br>(0.988/0.012) | GG (97.65) | 0.764 |
|                    |          |                      | GA (2.35)  |       |
|                    |          |                      | AA (0)     |       |
| <b>rs117893287</b> | 53981930 | C/T<br>(0.995/0.005) | CC (99.06) | 0.905 |
|                    |          |                      | CT (0.94)  |       |
|                    |          |                      | TT (0)     |       |
| <b>rs35090620</b>  | 53984623 | T/C<br>(0.533/0.467) | TT (28.84) | 0.655 |
|                    |          |                      | TC (48.90) |       |
|                    |          |                      | CC (22.25) |       |
| <b>rs7192822</b>   | 53986221 | T/C<br>(0.989/0.011) | TT (97.81) | 0.779 |
|                    |          |                      | TC (2.19)  |       |
|                    |          |                      | CC (0)     |       |
| <b>rs35510800</b>  | 53988267 | G/A<br>(0.713/0.287) | GG (50.78) | 0.924 |
|                    |          |                      | GA (41.07) |       |
|                    |          |                      | AA (8.15)  |       |
| <b>rs16952686</b>  | 53989673 | A/G<br>(0.966/0.034) | AA (93.42) | 0.140 |
|                    |          |                      | AG (6.27)  |       |
|                    |          |                      | GG (0.31)  |       |
| <b>rs1420572</b>   | 53993267 | C/A                  | CC (100)   | -     |

|                    |          |                      |                                        |       |
|--------------------|----------|----------------------|----------------------------------------|-------|
|                    |          | (100/0)              | CA (0)<br>AA (0)                       |       |
| <b>rs79755695</b>  | 53995500 | G/A<br>(0.976/0.024) | GG (95.14)<br>GA (4.86)<br>AA (0)      | 0.529 |
| <b>rs17823199</b>  | 53998930 | C/T<br>(0.476/0.524) | CC (23.82)<br>CT (47.49)<br>TT (28.68) | 0.226 |
| <b>rs147458024</b> | 54000198 | C/T<br>(0.996/0.004) | CC (99.21)<br>CT (0.78)<br>TT (0)      | 0.921 |
| <b>rs1344502</b>   | 54000792 | G/A<br>(0.371/0.629) | GG (15.20)<br>GA (43.73)<br>AA (41.07) | 0.113 |
| <b>rs7194907</b>   | 54003483 | C/T<br>(0.384/0.616) | CC (16.14)<br>CT (44.51)<br>TT (39.34) | 0.136 |
| <b>rs116290784</b> | 54004229 | C/T<br>(0.992/0.008) | CC (98.43)<br>CT (1.57)<br>TT (0)      | 0.842 |
| <b>rs9940629</b>   | 54004811 | A/G<br>(0.222/0.778) | AA (14.26)<br>AG (15.83)<br>GG (69.91) | 0.000 |
| <b>rs9932394</b>   | 54005099 | C/A<br>(0.371/0.629) | CC (16.30)<br>CA (41.69)<br>AA (42.01) | 0.007 |
| <b>rs76948577</b>  | 54006632 | C/T<br>(0.993/0.007) | CC (98.59)<br>CT (1.41)<br>TT (0)      | 0.858 |

---

|                    |          |                      |                                        |       |
|--------------------|----------|----------------------|----------------------------------------|-------|
| <b>rs77422645</b>  | 54007640 | G/A<br>(0.995/0.005) | GG (99.06)<br>GA (0.94)<br>AA (0)      | 0.905 |
| <b>rs113014601</b> | 54008225 | A/C<br>(0.987/0.013) | AA (97.49)<br>AC (2.51)<br>CC (0)      | 0.748 |
| <b>rs8056299</b>   | 54009501 | G/A<br>(0.231/0.769) | GG (6.27)<br>GA (33.70)<br>AA (60.03)  | 0.189 |
| <b>rs4784335</b>   | 54009688 | G/T<br>(0.245/0.755) | GG (6.58)<br>GT (35.89)<br>TT (57.52)  | 0.440 |
| <b>rs9888758</b>   | 54010321 | A/G<br>(0.078/0.922) | AA (86.67)<br>AG (10.97)<br>GG (2.36)  | 0.000 |
| <b>rs116907816</b> | 54014819 | A/C<br>(0.995/0.005) | AA (98.90)<br>AC (1.10)<br>CC (0)      | 0.889 |
| <b>rs139054159</b> | 54016869 | G/T<br>(0.988/0.012) | GG (97.81)<br>GT (2.03)<br>TT (0.16)   | 0.002 |
| <b>rs16952730</b>  | 54018921 | G/A<br>(0.523/0.477) | GG (31.19)<br>GA (42.16)<br>AA (26.65) | 0.000 |
| <b>rs76536391</b>  | 54019653 | C/T<br>(0.987/0.013) | CC (97.65)<br>CT (2.04)<br>TT (0.31)   | 0.000 |
| <b>rs12324955</b>  | 54019686 | G/A<br>(0.692/0.308) | GG (49.69)<br>GA (39.02)               | 0.033 |

---

|                    |          |                      |            |       |
|--------------------|----------|----------------------|------------|-------|
| <b>rs1125392</b>   | 54020145 | C/T<br>(0.266/0.734) | AA (11.29) | 0.069 |
|                    |          |                      | CC (8.46)  |       |
|                    |          |                      | CT (36.21) |       |
|                    |          |                      | TT (55.33) |       |
| <b>rs8049235</b>   | 54021009 | G/A<br>(0.797/0.203) | GG (65.83) | 0.000 |
|                    |          |                      | GA (27.74) |       |
|                    |          |                      | AA (6.43)  |       |
|                    |          |                      | TT (55.33) |       |
| <b>rs6499662</b>   | 54026739 | A/G<br>(0.846/0.154) | AA (72.88) | 0.008 |
|                    |          |                      | AG (23.35) |       |
|                    |          |                      | GG (3.76)  |       |
|                    |          |                      | TT (55.33) |       |
| <b>rs117071353</b> | 54028708 | C/T<br>(0.998/0.002) | CC (99.69) | 0.968 |
|                    |          |                      | CT (0.31)  |       |
|                    |          |                      | TT (0)     |       |
|                    |          |                      | TT (55.33) |       |
| <b>rs1966435</b>   | 54030526 | T/C<br>(0.556/0.444) | TT (33.39) | 0.010 |
|                    |          |                      | TC (44.36) |       |
|                    |          |                      | CC (22.26) |       |
|                    |          |                      | TT (55.33) |       |
| <b>rs8046658</b>   | 54031563 | T/C<br>(0.403/0.597) | TT (23.35) | 0.000 |
|                    |          |                      | TC (33.86) |       |
|                    |          |                      | CC (42.78) |       |
|                    |          |                      | TT (55.33) |       |
| <b>rs11646260</b>  | 54032493 | A/G<br>(0.859/0.141) | AA (74.61) | 0.083 |
|                    |          |                      | AG (22.57) |       |
|                    |          |                      | GG (2.82)  |       |
|                    |          |                      | TT (55.33) |       |
| <b>rs7200972</b>   | 54036352 | G/A<br>(0.313/0.687) | GG (12.07) | 0.007 |
|                    |          |                      | GA (38.40) |       |
|                    |          |                      | AA (49.53) |       |
|                    |          |                      | TT (55.33) |       |
| <b>rs12931859</b>  | 54039486 | C/T<br>(0.599/0.401) | CC (36.05) | 0.833 |
|                    |          |                      | CT (47.65) |       |
|                    |          |                      | TT (16.30) |       |
|                    |          |                      | TT (55.33) |       |
| <b>rs9922370</b>   | 54040916 | A/G                  | AA (88.24) | 0.821 |

|                    |          |                      |                                        |       |
|--------------------|----------|----------------------|----------------------------------------|-------|
|                    |          | (0.940/0.060)        | AG (11.44)<br>GG (0.31)                |       |
| <b>rs17226942</b>  | 54043514 | G/A<br>(0.924/0.074) | GG (86.68)<br>GA (11.91)<br>AA (1.41)  | 0.001 |
| <b>rs62034069</b>  | 54053483 | T/C<br>(0.983/0.017) | TT (96.55)<br>TC (3.45)<br>CC (0)      | 0.658 |
| <b>rs7194243</b>   | 54056159 | C/T<br>(0.502/0.498) | CC (27.43)<br>CT (45.45)<br>TT (27.42) | 0.022 |
| <b>rs17825519</b>  | 54056753 | T/C<br>(0.985/0.015) | TT (97.18)<br>TC (2.66)<br>CC (0.16)   | 0.020 |
| <b>rs7195994</b>   | 54060205 | G/A<br>(0.921/0.079) | GG (84.95)<br>GA (14.26)<br>AA (0.78)  | 0.586 |
| <b>rs111977557</b> | 54062556 | A/G<br>(0.998/0.002) | AA (99.53)<br>AG (0.47)<br>GG (0)      | 0.953 |
| <b>rs12051261</b>  | 54065210 | C/T<br>(0.706/0.294) | CC (50.94)<br>CT (39.34)<br>TT (9.71)  | 0.188 |
| <b>rs62034083</b>  | 54068320 | A/G<br>(0.984/0.016) | AA (96.71)<br>AG (3.29)<br>GG (0)      | 0.673 |
| <b>rs117659448</b> | 54070479 | T/C<br>(100/0)       | TT (100)<br>TC<br>CC                   | -     |

---

|                    |          |                      |                                        |       |
|--------------------|----------|----------------------|----------------------------------------|-------|
| <b>rs117309839</b> | 54073103 | C/T<br>(0.987/0.013) | CC (97.94)<br>CT (2.50)<br>TT (0)      | 0.748 |
| <b>rs4784351</b>   | 54075698 | A/G<br>(0.429/0.571) | AA (25.26)<br>AG (35.27)<br>GG (39.50) | 0.000 |
| <b>rs16952906</b>  | 54083167 | T/C<br>(0.960/0.040) | TT (92.31)<br>TC (7.37)<br>CC (0.31)   | 0.312 |
| <b>rs2540781</b>   | 54087859 | C/A<br>(0.894/0.106) | CC (81.97)<br>CA (14.89)<br>AA (3.13)  | 0.000 |
| <b>rs856973</b>    | 54093181 | G/T<br>(0.947/0.053) | GG (89.50)<br>GT (10.34)<br>TT (0.16)  | 0.524 |
| <b>rs117849391</b> | 54097226 | C/A<br>(0.997/0.003) | CC (99.37)<br>CA (0.63)<br>AA (0)      | 0.937 |
| <b>rs12446690</b>  | 54098681 | C/A<br>(0.946/0.054) | CC (89.50)<br>CA (10.19)<br>AA (0.31)  | 0.917 |
| <b>rs2003583</b>   | 54100006 | C/T<br>(0.591/0.409) | CC (37.93)<br>CT (42.32)<br>TT (19.75) | 0.002 |
| <b>rs62034115</b>  | 54105336 | T/C<br>(0.981/0.019) | TT (96.24)<br>TC (3.76)<br>CC (0)      | 0.628 |
| <b>rs9302656</b>   | 54108991 | G/A<br>(0.942/0.058) | GG (88.87)<br>GA (10.66)               | 0.536 |

---



|            |          |                      |            |       |
|------------|----------|----------------------|------------|-------|
| rs75361495 | 54109412 | A/G<br>(100/0)       | AA (0.47)  | -     |
|            |          |                      | AA (100)   |       |
|            |          |                      | AG (0)     |       |
|            |          |                      | GG (0)     |       |
| rs7206012  | 54113564 | T/C<br>(0.964/0.036) | TT (92.79) | 0.345 |
|            |          |                      | TC (7.21)  |       |
|            |          |                      | CC (0)     |       |
|            |          |                      | TT (0)     |       |
| rs967515   | 54114217 | C/T<br>(0.951/0.049) | CC (90.28) | 0.197 |
|            |          |                      | CT (9.72)  |       |
|            |          |                      | TT (0)     |       |
|            |          |                      | AA (98.59) |       |
| rs59134332 | 54114242 | A/G<br>(0.993/0.007) | AG (1.41)  | 0.858 |
|            |          |                      | GG (0)     |       |
|            |          |                      | GA (10.03) |       |
|            |          |                      | AA (2.04)  |       |
| rs16953002 | 54114824 | G/A<br>(0.929/0.071) | GG (87.93) | 0.000 |
|            |          |                      | GA (10.03) |       |
|            |          |                      | AA (2.04)  |       |
|            |          |                      | AA (49.69) |       |
| rs708258   | 54115369 | A/G<br>(0.687/0.313) | AG (38.09) | 0.004 |
|            |          |                      | GG (12.23) |       |
|            |          |                      | TT (38.87) |       |
|            |          |                      | TC (45.92) |       |
| rs1008400  | 54119892 | T/C<br>(0.618/0.382) | CC (15.20) | 0.495 |
|            |          |                      | AA (38.71) |       |
|            |          |                      | AG (46.87) |       |
|            |          |                      | GG (14.42) |       |
| rs78638652 | 54122162 | C/T<br>(0.992/0.008) | CC (98.43) | 0.842 |
|            |          |                      | CT (1.57)  |       |
|            |          |                      | TT (0)     |       |
|            |          |                      | GG (83.39) |       |
| rs11863548 | 54123512 | G/A                  | GG (83.39) | 0.000 |

|                    |          |               |            |       |
|--------------------|----------|---------------|------------|-------|
|                    |          | (0.895/0.105) | GA (12.23) |       |
|                    |          |               | AA (4.39)  |       |
| <b>rs708250</b>    | 54125040 | G/A           | GG (0.16)  | 0.120 |
|                    |          | (0.984/0.020) | GA (3.61)  |       |
|                    |          |               | AA (96.24) |       |
| <b>rs2665271</b>   | 54127879 | T/C           | TT (17.71) | 0.633 |
|                    |          | (0.585/0.415) | TC (47.65) |       |
|                    |          |               | CC (34.64) |       |
| <b>rs62034138</b>  | 54129948 | G/A           | GG (71.32) | 0.254 |
|                    |          | (0.841/0.159) | GA (25.55) |       |
|                    |          |               | AA (3.13)  |       |
| <b>rs71392011</b>  | 54150035 | C/A           | CC (97.18) | 0.718 |
|                    |          | (0.986/0.014) | CA (2.82)  |       |
|                    |          |               | AA (0)     |       |
| <b>rs2542681</b>   | 54150216 | A/T           | AA (5.17)  | 0.112 |
|                    |          | (0.204/0.796) | AT (30.41) |       |
|                    |          |               | TT (64.42) |       |
| <b>rs191211628</b> | 54151267 | T/C           | TT (97.81) | 0.779 |
|                    |          | (0.989/0.011) | TC (2.19)  |       |
|                    |          |               | CC (0)     |       |
| <b>rs12597001</b>  | 54151411 | G/T           | GG (45.61) | 0.000 |
|                    |          | (0.643/0.357) | GT (37.30) |       |
|                    |          |               | TT (17.08) |       |
| <b>rs12444954</b>  | 54155047 | A/G           | AA (46.08) | 0.000 |
|                    |          | (0.551/0.449) | AG (18.03) |       |
|                    |          |               | GG (35.89) |       |
| <b>rs531076397</b> | 54155348 | G/T           | GG (100)   | -     |
|                    |          | (100/0)       | GT (0)     |       |
|                    |          |               | TT (0)     |       |

---

|            |          |               |            |       |
|------------|----------|---------------|------------|-------|
| rs11865975 | 54155409 | C/T           | CC (98.75) | 0     |
|            |          | (0.994/0.006) | CT (1.25)  |       |
|            |          |               | TT (0)     |       |
| rs77601508 | 54155511 | G/T           | GG (99.84) | 0.984 |
|            |          | (0.999/0.001) | GT (0.16)  |       |
|            |          |               | TT (0)     |       |
| rs12929934 | 54155686 | G/A           | GG (57.37) | 0.000 |
|            |          | (0.733/0.267) | GA (31.82) |       |
|            |          |               | AA (10.82) |       |

---
